# Supplementary material for: Advancing computational biology and bioinformatics research through open innovation competitions
Source: PubMed Central journal article supplement (PMC6764653; doi:10.1371/journal.pone.0222165), 2019-09-27
Supplement: pone.0222165.s001.pdf [file pone.0222165.s001.pdf]

**S1 Appendix. Competition evaluation for Antibody challenge.** Evaluation of a multi-task challenge such as this, which aims to yield performance gains in speed and memory use while maintaining a high degree of accuracy, requires some care due to the unavoidable interplay between performance characteristics which is inherent to scalar metrics. Therefore, we developed a weighted scoring function to evaluate the contestants’ solutions against the gold standards. For a given dataset, scores were assigned to each algorithm based on

$$S(t/t_0, ACC) = \left[ \frac{\max(0, ACC - 1 + \epsilon)}{\epsilon} \right]^4 \frac{1}{\max(1, t/t_0)}, \quad (1)$$

where  $t$  is the computation time required for a given test set on a 32 core server,  $ACC$  is the associated accuracy of the computation compared to the gold standards,  $\epsilon = 10^{-2}$ , and  $t_0 = 100\text{ms}$ . Solutions that exceeded a memory use threshold of 3GB received a score of zero. The accuracy ( $ACC$ ) was determined from the similarity between two clustering based on an adaptation of the Rand index [1]. The final evaluation was based on the average performance on multiple test sets, after normalizing the scores for each test set by the top-performing solution.

## References

1. Rand WM. Objective Criteria for the Evaluation of Clustering Methods. Journal of the American Statistical Association. 1971;66(336):846–850.  
doi:10.1080/01621459.1971.10482356.
