# Supplementary material for: Advancing computational biology and bioinformatics research through open innovation competitions
Source: PubMed Central journal article supplement (PMC6764653; doi:10.1371/journal.pone.0222165), 2019-09-27
Supplement: pone.0222165.s002.pdf [file pone.0222165.s002.pdf]

**S2 Appendix. Competition evaluation for Gene Inference challenge.** To assess imputation accuracy, we created an evaluation metric that balanced both absolute and relative measures of accuracy. Let  $P_{ij}$  represent the predicted expression levels for a set of samples, indexed by  $i = 1, \dots, N$ , and non-landmark gene labels, indexed by  $j = 1, \dots, M$  (for this study,  $M = 11350$ ). Similarly, let  $G_{ik}$  represent the true (measured) expression levels for the same set of samples and non-landmark genes, indexed  $k = 1, \dots$ . For each pair of gene labels  $j, k$ , construct the Spearman rank correlation matrix elements  $\rho_{jk}(P, G)$  between prediction and truth data across all the samples. For a given gene label  $j$ , let  $R_j(P, G)$  be the relative rank of the correlations  $\rho_{ij}(P, G)$  where  $k = j$  with respect to the remaining correlations  $k \neq j$ . The score attributed to each gene-level prediction is given by an equally-weighted average of the Spearman correlation between prediction and truth data, and the relative rank of the correlation when compared with the correlations associated with the remaining genes:

$$S_j(P, G) = \frac{1}{2} \left[ \rho_{jj}(P, G) + \frac{1}{M} R_j(P, G) \right]$$

For this competition, gene-level scores were normalized with respect to a benchmark algorithm, which was based on a linear regression model. Let  $B_{ij}$  represent the predictions made by the benchmark algorithm and  $S_j(B, G)$  represent the gene-level scores associated with the benchmark predictions. The final quality of the predictions was determined based on the average:

$$\bar{S}(P, B, G) = \frac{1}{M} \sum_{j=1}^M \frac{2 - S_j(B, G)}{2 - S_j(P, G)}.$$
