# Supplementary material for: Advancing computational biology and bioinformatics research through open innovation competitions
Source: PubMed Central journal article supplement (PMC6764653; doi:10.1371/journal.pone.0222165), 2019-09-27
Supplement: pone.0222165.s005.pdf [file pone.0222165.s005.pdf]

**S1 Dataset. Data Access for Antibody challenge.** Data (including training, testing and validation) and codes (including the benchmark clustering algorithms and the top solutions of the contestants) are available within Harvard Dataverse (<https://doi.org/10.7910/DVN/5PNPKJ>). Additional data, including the problem statement, final leaderboard, and all code submissions can be found online on Topcoder's website at <https://community.topcoder.com/longcontest/?module=ViewProblemStatement&rd=16298&pm=13537>.
