# Supplementary material for: Advancing computational biology and bioinformatics research through open innovation competitions
Source: PubMed Central journal article supplement (PMC6764653; doi:10.1371/journal.pone.0222165), 2019-09-27
Supplement: pone.0222165.s007.pdf [file pone.0222165.s007.pdf]

**S3 Dataset. Data access for Query Speedup challenge.** The problem statement, final leaderboard, and all code submissions can be found online on Topcoder's website at <https://community.topcoder.com/longcontest/?module=ViewProblemStatement&rd=16833&pm=14534>.

The data sets used for this contest are publicly available on CMap's website (<https://clue.io>) at [https://clue.io/data/CT#CT\\_QSPD](https://clue.io/data/CT#CT_QSPD).
