# Supplementary material for: Advancing computational biology and bioinformatics research through open innovation competitions
Source: PubMed Central journal article supplement (PMC6764653; doi:10.1371/journal.pone.0222165), 2019-09-27
Supplement: pone.0222165.s008.pdf [file pone.0222165.s008.pdf]

**S1 Table. Data sets for Gene Inference challenge.** This table summarizes the training, validation and test data sets used for training and evaluation in this challenge.

**Table 1. Data sets for the Gene inference challenge**

| Dataset  | Size (genes $\times$ samples) | Platform   | Source           |
|----------|-------------------------------|------------|------------------|
| Current  | $12,320 \times 12,000$        | Affymetrix | GEO              |
| Training | $12,320 \times 100,000$       | Affymetrix | GEO              |
| Testing  | $970 \times 1,600$            | L1000      | GTE <sub>x</sub> |
| Ground   | $12,320 \times 1,600$         | RNA-Seq    | GTE <sub>x</sub> |

Competitors had access to the Training data set that they could use to develop their solutions. Their solutions were evaluated on the Testing (for provisional scoring) and Ground (for final scoring) data sets. The benchmark MLR method was initially trained on the Current data set.
