# Supplementary material for: Advancing computational biology and bioinformatics research through open innovation competitions
Source: PLoS One. 2019 Sep 27;14(9):e0222165. doi: 10.1371/journal.pone.0222165 (PMC6764653; doi:10.1371/journal.pone.0222165)
Supplement: S4 Appendix — (PDF) [file pone.0222165.s004.pdf]

**S4 Appendix. CMap query methodology.** To assess the similarity between a query and a signature, the methodology used by CMap is based on the weighted Kolmogorov-Smirnov enrichment statistic [1]. This statistic reflects the degree to which genes in the query  $q$  are overrepresented at the top or bottom of the signature  $s$ .

Let a signature  $s$  be a vector of  $G$  differential expression values  $x_g$  for each gene  $g$  with  $g = 1, 2, \dots, G$ . Let a query  $q$  be a list  $q = \{G_{\text{up}}, G_{\text{down}}\}$  of two disjoint gene sets  $G_{\text{up}}$  and  $G_{\text{down}}$  indicating which genes are expected to be up- and down-regulated (the biological state of interest).

The weighted Kolmogorov-Smirnov enrichment statistic is computed as follows:

1. For each gene set  $G_j$ , compute the sum of values at all positions of  $s$  that correspond to genes in  $G_j$ :

$$s_{\text{sum},j} = \sum_{g \in G_j} x_g, \quad j = \{\text{down}, \text{up}\};$$

2. Sort  $s$  in descending order to obtain a rank-ordered signature  $s^r$
3. For each gene set  $G_j$ , compute a running sum statistic  $rss_{g,j}$  that walks down the rank-ordered signature  $s^r$  and, at each rank position  $r_g$  corresponding to a gene  $g$ , is incremented by a factor  $r_g/s_{\text{sum},j}$  when  $g \in G_j$ , otherwise is reduced by  $1/(G - |G_j|)$ ;
4. Compute the maximum deviation of the running statistic  $rss_{g_{\text{max}},j}$  from zero for both gene sets  $j = \text{down}, \text{up}$
5. Finally, if the deviations corresponding to each gene set have a different sign, return the average absolute deviation; otherwise return zero (i.e., no similarity is found).

Extending this procedure to a database with  $S$  signatures and  $Q$  queries is straightforward and it consists of iteratively applying the above procedure to all pairs of signatures and queries.

## References

1. Subramanian A, et al. A Next Generation Connectivity Map: L1000 Platform and the First 1,000,000 Profiles. *Cell*. 2018;171(6):1437–1452.e17.
